# Supplementary material for: Visible light-driven self-powered aptasensors for ultrasensitive Microcystin-LR detection based on the carrier density effect of N-doped graphene hydrogel/hematite Schottky junctions
Source: Royal Society of Chemistry journal article supplement (doi:10.1039/d1an01462e), 2021-01-01
Supplement: d1an01462e1.pdf [file d1an01462e1.pdf]

## Electronic Supplementary Information

### **Visible light-driven self-powered aptasensor for ultrasensitive Microcystin-LR detection based on the carrier density effect of N-doped graphene hydrogel/hematite Schottky junction**

*Linhua Zhang,<sup>a</sup> Ding Jiang,<sup>a,b,\*</sup> Xueling Shan,<sup>a,b</sup> Xiaojiao Du,<sup>c</sup> Meng Wei,<sup>a</sup> Yude*

*Zhang,<sup>a</sup> Zhidong Chen<sup>a,b,\*</sup>*

*<sup>a</sup> Jiangsu Key Laboratory of Advanced Catalytic Materials and Technology, School of Petrochemical Engineering, Changzhou University, Changzhou 213164, China*

*<sup>b</sup> Advanced Catalysis and Green Manufacturing Collaborative Innovation Center, Changzhou University, Changzhou 213164, China*

*<sup>c</sup> Oakland International Associated Laboratory, School of Photoelectric Engineering, Changzhou Institute of Technology, Changzhou, Jiangsu, 213032, P. R. China*

---

\*Corresponding author.

E-mail address: jiangding@cczu.edu.cn (D. Jiang)

zdchen@cczu.edu.cn (Z. Chen)

## Contents.

|                                                                                                                                                                   |            |
|-------------------------------------------------------------------------------------------------------------------------------------------------------------------|------------|
| <b>Materials and reagents .....</b>                                                                                                                               | <b>S3</b>  |
| <b>Synthesis of Graphite Oxide (GO) .....</b>                                                                                                                     | <b>S3</b>  |
| <b>Synthesis of different nitrogen content NGH/Fe<sub>2</sub>O<sub>3</sub> .....</b>                                                                              | <b>S3</b>  |
| <b>XPS survey patterns of NGH/Fe<sub>2</sub>O<sub>3</sub> and high-resolution spectra of the Fe 2p in<br/>    NGH/Fe<sub>2</sub>O<sub>3</sub> (Fig. S1) .....</b> | <b>S5</b>  |
| <b>Mott-Schottky plot of pure Fe<sub>2</sub>O<sub>3</sub> (Fig. S2) .....</b>                                                                                     | <b>S6</b>  |
| <b>XPS patterns of NGH/Fe<sub>2</sub>O<sub>3</sub> with different glycine (Fig. S3) .....</b>                                                                     | <b>S7</b>  |
| <b>Optimization of Experimental Conditions (Fig. S4) .....</b>                                                                                                    | <b>S8</b>  |
| <b>Tauc plots showing (αhν)<sup>2</sup> versus hν curves (Fig. S5) .....</b>                                                                                      | <b>S9</b>  |
| <b>Comparison for the determination of MC-LR (Table S1) .....</b>                                                                                                 | <b>S10</b> |

## Materials and reagents

Concentrated sulfuric acid ( $\text{H}_2\text{SO}_4$ ), potassium nitrate ( $\text{KNO}_3$ ), potassium permanganate ( $\text{KMnO}_4$ ), hydrogen peroxide ( $\text{H}_2\text{O}_2$ ), iron nitrate ( $\text{Fe}(\text{NO}_3)_3 \cdot 9\text{H}_2\text{O}$ ), dimethylformamide (DMF), hydrochloric acid (HCl), sodium sulfate ( $\text{Na}_2\text{SO}_4$ ), sodium hydroxide (NaOH), glycine and ethanol were purchased from Sinopharm Chemical Reagent Co., Ltd. Natural flake graphite was obtained from Tsingtao Longyuan Carbon Materials Co., Ltd. The MC-LR was achieved from Enzo Life Sciences, Inc. and its aptamer was gained from Sangon Biotech Co., Ltd., with the following sequence: 5'-GGC GCC AAA CAG GAC CAC CAT GAC AAT TAC CCA TAC CAC CTC ATT ATG CCC CAT CTC CGC -3'.

## Synthesis of Graphite Oxide (GO)

A modified Hummers method was used to prepare GO in this experiment.<sup>1</sup> Briefly, flake graphite (5 g) and  $\text{NaNO}_3$  (3 g) were put into a flask, and concentrated  $\text{H}_2\text{SO}_4$  (120 mL, 98%) was added under stirring in an ice bath.  $\text{KMnO}_4$  (22.5 g) was slowly added to the above mixture over 1 h and followed by continuously stirring at 23°C for 2 h. Then  $\text{H}_2\text{SO}_4$  aqueous solution (700 mL, 5 wt %) was slowly added under stirring, and the temperature was kept at 98°C. When the temperature was decreased to 60°C,  $\text{H}_2\text{O}_2$  aqueous solution (15 mL, 30 wt %) was added. The product was washed with HCl solution (5 wt %) and distilled water several times and freeze-dried.

## **Synthesis of different nitrogen content NGH/Fe<sub>2</sub>O<sub>3</sub>**

To further studied the effect of nitrogen content on porosity and photoelectricity, the as-synthesized NGH/Fe<sub>2</sub>O<sub>3</sub> samples with different glycine mass of 0 mg, 100 mg, 200 mg, and 300 mg were prepared in the meanwhile with the same method. (Among these, the sample with 0 mg glycine was marked as G-Fe<sub>2</sub>O<sub>3</sub>.)

## Results and discussion

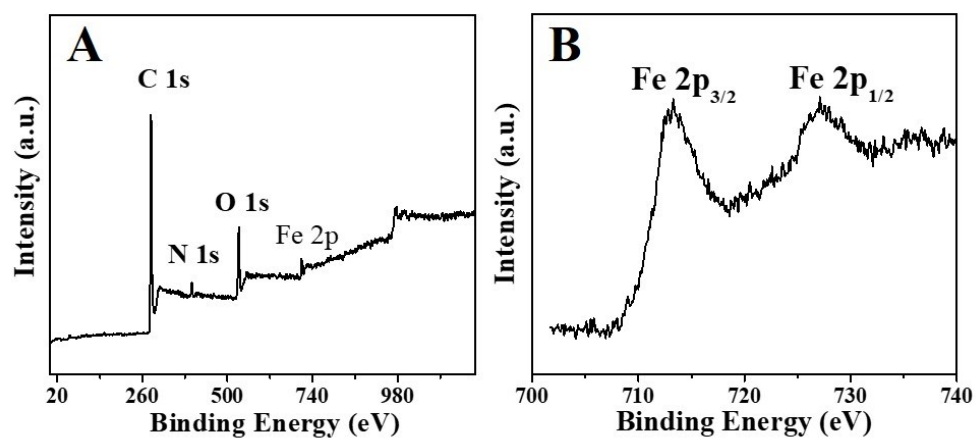

**Fig. S1.** XPS survey patterns of NGH/Fe<sub>2</sub>O<sub>3</sub> (A) and high-resolution spectra of the Fe 2p in NGH/Fe<sub>2</sub>O<sub>3</sub> (B).

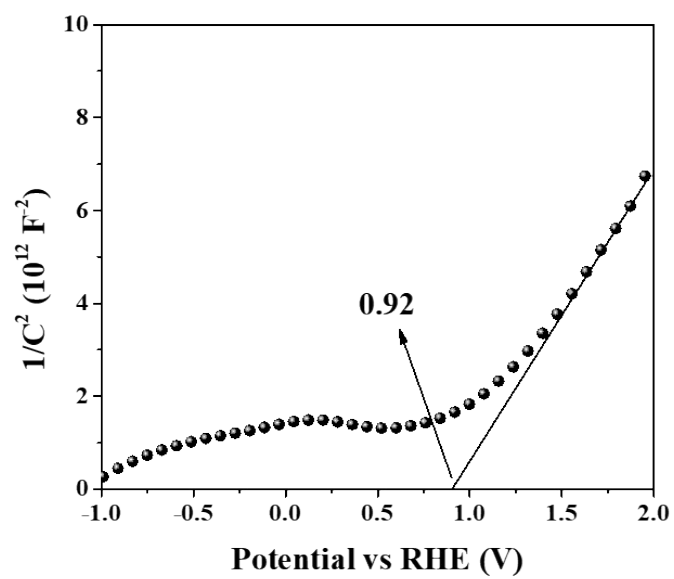

**Fig. S2.** Mott-Schottky plot of pure Fe<sub>2</sub>O<sub>3</sub>.

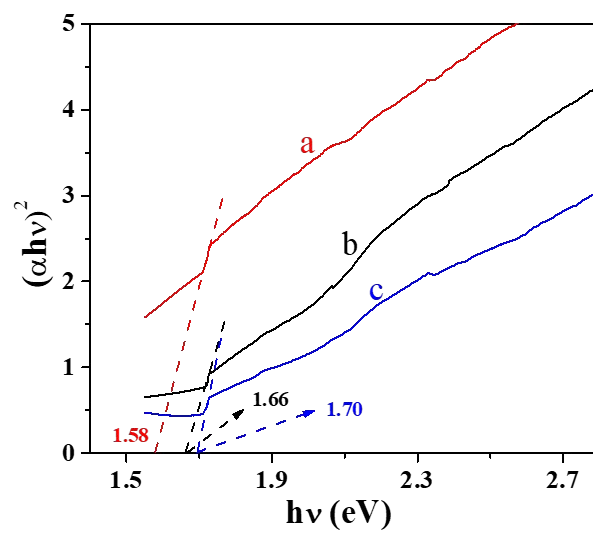

**Fig. S3.** Tauc plots showing  $(\alpha h\nu)^2$  versus  $h\nu$  curves of (a) NGH/Fe<sub>2</sub>O<sub>3</sub>, (b) G/Fe<sub>2</sub>O<sub>3</sub> and (c) Fe<sub>2</sub>O<sub>3</sub>.

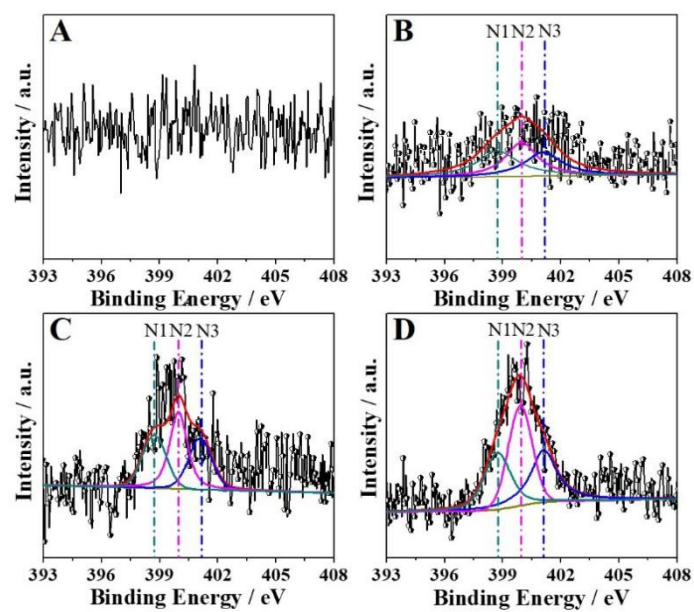

**Fig. S4.** XPS patterns of NGH/Fe<sub>2</sub>O<sub>3</sub> with different glycine: (A) 0 mg, (B) 100 mg, (C) 200 mg, and (D) 300 mg.



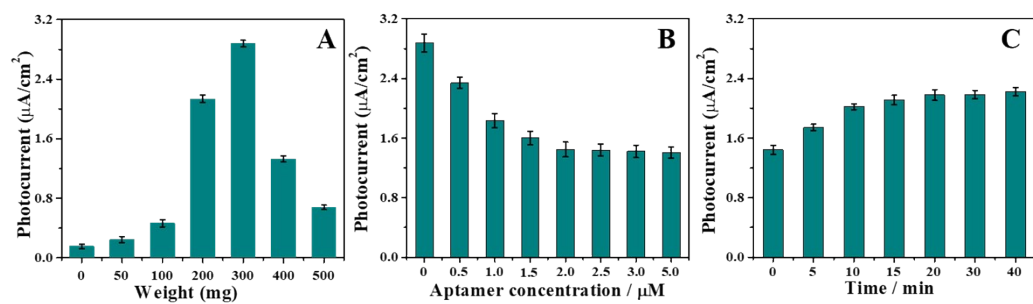

**Fig. S5.** Photocurrents of NGH/ $\text{Fe}_2\text{O}_3$  with different (A) glycine additions (B) aptamer concentrations and (C) incubation time.

**Table S1.** Comparison of different methods for the determination of MC-LR

| Method                         | Linear range (nM) | Detection<br>limit(nM) | Ref.      |
|--------------------------------|-------------------|------------------------|-----------|
| Protein phosphatase inhibition | 0.93 ~ 40.51      | 0.93                   | 2         |
| Fluorescent aptasensor         | 0.4 ~ 1200        | 0.138                  | 3         |
| Colorimetric sensor            | 0.5 ~ 7500        | 0.37                   | 4         |
| PEC immunoassay                | 0.005 ~ 503       | 0.001                  | 5         |
| PEC immunoassay                | 0.01 ~ 10         | 0.055                  | 6         |
| PEC aptasensor                 | 0.001 ~ 5         | $0.23 \times 10^{-3}$  | This work |

## References

1. X. Bai, Y. Zhai and Y. Zhang, *J. Phys. Chem. C*, 2011, **115**, 11673-11677.
2. G. Catanante, L. Espin and J. L. Marty, *Biosens. Bioelectron.*, 2015, **67**, 700-707.
3. S. M. Taghdisi, N. M. Danesh, M. Ramezani, N. Ghows, S. A. Mousavi Shaegh and K. Abnous, *Talanta*, 2017, **166**, 187-192.
4. X. Li, R. Cheng, H. Shi, B. Tang, H. Xiao and G. Zhao, *J. Hazard. Mater.*, 2016, **304**, 474-480.
5. J. Wei, A. Qileng, Y. Yan, H. Lei, S. Zhang, W. Liu and Y. Liu, *Anal. Chim. Acta*, 2017, **994**, 82-91.
6. J. Tian, H. Zhao, X. Quan, Y. Zhang, H. Yu and S. Chen, *Sens. Actuators, B*, 2014, **196**, 532-538.
